# Supplementary material for: Research on the Glass Beads from the Nanhai I Shipwreck: A Potash-lead Glass Bead Technological Tradition Originating from Han Dynasty Lingnan
Source: Research Square preprint supplement (doi:10.21203/rs.3.rs-8344564/v1), 2025-12-18
Supplement: Supplementary file 1 [file 972d8c03c85f2b888df43f35.xlsx]

## Sheet: Sheet 1
Table S2 Pb isotope ratios of the glass beads, glaze ceramic, bronze coins and rings dated to Song Dynasty from Nanhai No.1 shipwreck and Baijiao site in Hainan
Sample N0.	206Pb/204Pb	207Pb/204Pb	208Pb/204Pb	207Pb/206Pb	208Pb/206Pb	Type	Site	Dynastic Chronology	Date (CE)	Note	Reference
Large yellow bead	18.1231	15.628	38.6127	0.862325	2.13058	Glass bead	Nanhai No. I shipwreck	Southern Song Dynasty	1127-1279		[1]
Small yellow bead	18.1423	15.6344	38.6502	0.861765	2.13039	Glass bead	Nanhai No. I shipwreck	Southern Song Dynasty	1127-1279		[1]
NHLB1	18.1129	15.604	38.4886	0.861485	2.12493	Lead bead	Nanhai No. I shipwreck	Southern Song Dynasty	1127-1279	lead–tin alloy (Pb > 90%, Sn < 10%, K< 5%)	[2]
NHLB2	18.1021	15.5887	38.3992	0.861154	2.12126	Lead bead	Nanhai No. I shipwreck	Southern Song Dynasty	1127-1279		[2]
NHLB3	18.1093	15.5941	38.5353	0.86111	2.12793	Lead bead	Nanhai No. I shipwreck	Southern Song Dynasty	1127-1279		[2]
NHLB4	18.1038	15.5774	38.482	0.860449	2.12563	Lead bead	Nanhai No. I shipwreck	Southern Song Dynasty	1127-1279		[2]
NHLB5	18.1191	15.6069	38.5249	0.861351	2.1262	Lead bead	Nanhai No. I shipwreck	Southern Song Dynasty	1127-1279		[2]
NHLB6	18.1283	15.6121	38.5969	0.8612	2.1291	Lead bead	Nanhai No. I shipwreck	Southern Song Dynasty	1127-1279		[2]
NHLB7	18.113	15.6047	38.5381	0.861519	2.12765	Lead bead	Nanhai No. I shipwreck	Southern Song Dynasty	1127-1279		[2]
NHLB8	18.1098	15.5951	38.5576	0.861141	2.1291	Lead bead	Nanhai No. I shipwreck	Southern Song Dynasty	1127-1279		[2]
NHLB9	18.1026	15.5939	38.3728	0.861418	2.11974	Lead bead	Nanhai No. I shipwreck	Southern Song Dynasty	1127-1279		[2]
NHLB10	18.1115	15.5989	38.5117	0.86127	2.12637	Lead bead	Nanhai No. I shipwreck	Southern Song Dynasty	1127-1279		[2]
NHLB11	18.1234	15.6091	38.5562	0.861268	2.12743	Lead bead	Nanhai No. I shipwreck	Southern Song Dynasty	1127-1279		[2]
NHI-GC1	18.1406	15.6352	38.658	0.86189	2.13102	Lead-silica glaze	Nanhai No. I shipwreck	Southern Song Dynasty	1127-1279	Green glaze of ceramics from Cizao kiln (PbO-SiO2)	[1]
TZ1	18.417	15.707	38.839	0.853	2.109	Bronze ring	Nanhai No. I shipwreck	Southern Song Dynasty	1127-1279		[3]
TZ2	18.263	15.661	38.749	0.858	2.122	Bronze ring	Nanhai No. I shipwreck	Southern Song Dynasty	1127-1279		[3]
TZ3	18.316	15.693	38.844	0.857	2.121	Bronze ring	Nanhai No. I shipwreck	Southern Song Dynasty	1127-1279		[3]
TZ4	18.353	15.681	38.844	0.854	2.117	Bronze ring	Nanhai No. I shipwreck	Southern Song Dynasty	1127-1279		[3]
TZ5	18.254	15.656	38.746	0.858	2.123	Bronze ring	Nanhai No. I shipwreck	Southern Song Dynasty	1127-1279		[3]
TZ6	18.348	15.71	38.909	0.856	2.12	Bronze ring	Nanhai No. I shipwreck	Southern Song Dynasty	1127-1279		[3]
TZ7	18.297	15.672	38.797	0.856	2.12	Bronze ring	Nanhai No. I shipwreck	Southern Song Dynasty	1127-1279		[3]
TZ8	18.276	15.634	38.716	0.855	2.118	Bronze ring	Nanhai No. I shipwreck	Southern Song Dynasty	1127-1279		[3]
TZ9	18.339	15.664	38.793	0.854	2.115	Bronze ring	Nanhai No. I shipwreck	Southern Song Dynasty	1127-1279		[3]
TZ10	18.383	15.694	38.905	0.854	2.116	Bronze ring	Nanhai No. I shipwreck	Southern Song Dynasty	1127-1279		[3]
TZ11	18.378	15.7	38.882	0.854	2.116	Bronze ring	Nanhai No. I shipwreck	Southern Song Dynasty	1127-1279		[3]
TZ12	18.367	15.695	38.865	0.855	2.116	Bronze ring	Nanhai No. I shipwreck	Southern Song Dynasty	1127-1279		[3]
TZ13	18.442	15.753	39.005	0.854	2.115	Bronze ring	Nanhai No. I shipwreck	Southern Song Dynasty	1127-1279		[3]
TZ14	18.412	15.689	38.918	0.852	2.114	Bronze ring	Nanhai No. I shipwreck	Southern Song Dynasty	1127-1279		[3]
TZ15	18.346	15.692	38.852	0.855	2.118	Bronze ring	Nanhai No. I shipwreck	Southern Song Dynasty	1127-1279		[3]
TZ16	18.258	15.659	38.753	0.858	2.122	Bronze ring	Nanhai No. I shipwreck	Southern Song Dynasty	1127-1279		[3]
TZ17	18.309	15.679	38.835	0.856	2.121	Bronze ring	Nanhai No. I shipwreck	Southern Song Dynasty	1127-1279		[3]
TZ18	18.322	15.681	38.841	0.856	2.12	Bronze ring	Nanhai No. I shipwreck	Southern Song Dynasty	1127-1279		[3]
TZ19	18.354	15.692	38.852	0.855	2.117	Bronze ring	Nanhai No. I shipwreck	Southern Song Dynasty	1127-1279		[3]
TZ20	18.373	15.71	38.899	0.855	2.117	Bronze ring	Nanhai No. I shipwreck	Southern Song Dynasty	1127-1279		[3]
TZ21	18.408	15.731	38.961	0.855	2.116	Bronze ring	Nanhai No. I shipwreck	Southern Song Dynasty	1127-1279		[3]
NH1	18.599	15.719	38.938	0.845153	2.09355	Bronze coin (N)	Nanhai No. Ⅰ shipwreck	Northern Song Dynasty	990–994	Chunhuayuanbao (淳化通宝)	[4]
NH2	18.111	15.621	38.594	0.862514	2.13097	Bronze coin (N)	Nanhai No. Ⅰ shipwreck	Northern Song Dynasty	1017–1021	Tianxitongbao (天禧通宝)	[4]
NH3	18.199	15.561	38.445	0.855047	2.11248	Bronze coin (N)	Nanhai No. Ⅰ shipwreck	Northern Song Dynasty	1023–1032	Tianshengyuanbao (天圣元宝)	[4]
NH4	18.524	15.77	39.018	0.851328	2.10635	Bronze coin (N)	Nanhai No. Ⅰ shipwreck	Northern Song Dynasty	1039–1053	Huangsong tongbao (皇宋通宝)	[4]
NH5	18.035	15.578	38.356	0.863765	2.12675	Bronze coin (N)	Nanhai No. Ⅰ shipwreck	Northern Song Dynasty	1068–1077	Xiningyuanbao (熙宁元宝)	[4]
NH6	18.609	15.708	38.961	0.844108	2.09366	Bronze coin (N)	Nanhai No. Ⅰ shipwreck	Northern Song Dynasty	1068–1077	Xiningzhongbao (熙宁重宝)	[4]
NH7	18.558	15.721	38.966	0.847128	2.09969	Bronze coin (N)	Nanhai No. Ⅰ shipwreck	Northern Song Dynasty	1078–1085	Yuanfengtongbao (元丰通宝)	[4]
NH8	18.486	15.732	38.936	0.851022	2.10624	Bronze coin (N)	Nanhai No. Ⅰ shipwreck	Northern Song Dynasty	1086–1094	Yuanyou tongbao (元祐通宝)	[4]
NH9	18.772	15.739	39.263	0.83843	2.09157	Bronze coin (N)	Nanhai No. Ⅰ shipwreck	Northern Song Dynasty	1094–1098	Shaoshengyuanbao (绍圣元宝)	[4]
NH10	18.445	15.612	38.608	0.846408	2.09314	Bronze coin (N)	Nanhai No. Ⅰ shipwreck	Northern Song Dynasty	1111–1118	Zhenghetongbao (政和通宝)	[4]
NH11	18.218	15.634	38.647	0.858162	2.12136	Bronze coin (N)	Nanhai No. Ⅰ shipwreck	Northern Song Dynasty	1119–1125	Xuanhetongbao (宣和通宝)	[4]
NH12	18.153	15.601	38.412	0.859417	2.11601	Bronze coin (N)	Nanhai No. Ⅰ shipwreck	Southern Song Dynasty	1127–1130	Jianyantongbao (建炎通宝)	[4]
NH13	18.074	15.543	38.298	0.859965	2.11896	Bronze coin (N)	Nanhai No. Ⅰ shipwreck	Southern Song Dynasty	1131–1162	Shaoxingyuanbao (绍兴元宝)	[4]
NH14	18.119	15.604	38.47	0.861195	2.12319	Bronze coin (N)	Nanhai No. Ⅰ shipwreck	Southern Song Dynasty	1131–1162	Shaoxingtongbao (绍兴通宝)	[4]
ZY-NH-29	18.3584	15.6849	38.7803	0.854372	2.1124	Bronze coin (B)	Beijiao site	Northern Song Dynasty	1008-1016	Xiangfutongbao (祥符通宝)	[5]
ZY-NH-31	18.1541	15.642	38.6653	0.861624	2.12984	Bronze coin (B)	Beijiao site	Northern Song Dynasty	1017-1021	Tianxitongbao (天禧通宝)	[5]
ZY-NH-14	18.2837	15.6607	38.7422	0.856539	2.11895	Bronze coin (B)	Beijiao site	Northern Song Dynasty	1039-1059	Huangsongtongbao (皇宋通宝)	[5]
ZY-NH-16	18.5836	15.7583	39.1635	0.847968	2.10742	Bronze coin (B)	Beijiao site	Northern Song Dynasty	1039-1059	Huangsongtongbao (皇宋通宝)	[5]
ZY-NH-8	18.1965	15.6491	38.6947	0.860006	2.12649	Bronze coin (B)	Beijiao site	Northern Song Dynasty	1068-1077	Xiningyuanbao (熙宁元宝)	[5]
ZY-NH-1	18.1649	15.6407	38.6221	0.86104	2.12619	Bronze coin (B)	Beijiao site	Northern Song Dynasty	1078-1085	Yuanfengtongbao (元丰通宝)	[5]
ZY-NH-2	18.3332	15.6836	38.8089	0.855475	2.11686	Bronze coin (B)	Beijiao site	Northern Song Dynasty	1078-1085	Yuanfengtongbao (元丰通宝)	[5]
ZY-NH-3	18.1384	15.6339	38.6462	0.861923	2.13063	Bronze coin (B)	Beijiao site	Northern Song Dynasty	1078-1085	Yuanfengtongbao (元丰通宝)	[5]
ZY-NH-4	18.4557	15.7578	38.9403	0.853818	2.10993	Bronze coin (B)	Beijiao site	Northern Song Dynasty	1078-1085	Yuanfengtongbao (元丰通宝)	[5]
Reference:
[1]Tian C et al (2021) Characterization of glass beads from Nanhai I shipwreck and new evidence of lead tin yellow type II in China. Herit Sci 9:61
[2] Li, N., Chen, D., Li, C. et al. Provenance and production of lead beads from the Nanhai No. I shipwreck: insights from neutron imaging and multi-technique analysis. Eur. Phys. J. Plus 140, 1075 (2025). https://doi.org/10.1140/epjp/s13360-025-07014-4
[3] D. Chen, N.S. Li, W.G. Luo, Beneath the waves: tracing contraband bronze rings in Nanhai No I shipwreck. J. Maritime Archaeology 3, 81–99 (2024)
[4] Ma, D., D. Chen, N. Li, Y. Chen, J. Du, and W. Luo. 2022.“Archaeometallurgical Research on the Bronze Coins of Song Dynasty.(960–1279 AD) From Nanhai No. I Shipwreck, the South China Sea.”Journal of Archaeological Science: Reports 45: 103581.
[5] Dong Liu, Youjin Wu, Zhao Li, Ruiwen Zhang, Fanzhen Feng, Bingsheng Zhang, Fang Huang, Anchuan Fan, Zhengyao Jin.Source and Role of Bronze Coins in Maritime Trade During the Song (960–1276 AD): Focus on New Discoveries of Underwater Copper Metal Relics in the South China Sea.Archaeometry.2025,0:1–10. https://doi.org/10.1111/arcm.70067
